# Supplementary material for: Hybrid Schottky and heterojunction vertical β-Ga2O3 rectifiers
Source: Royal Society of Chemistry journal article supplement (doi:10.1039/d4tc03046j), 2024-01-01

Supplemental file showing original data

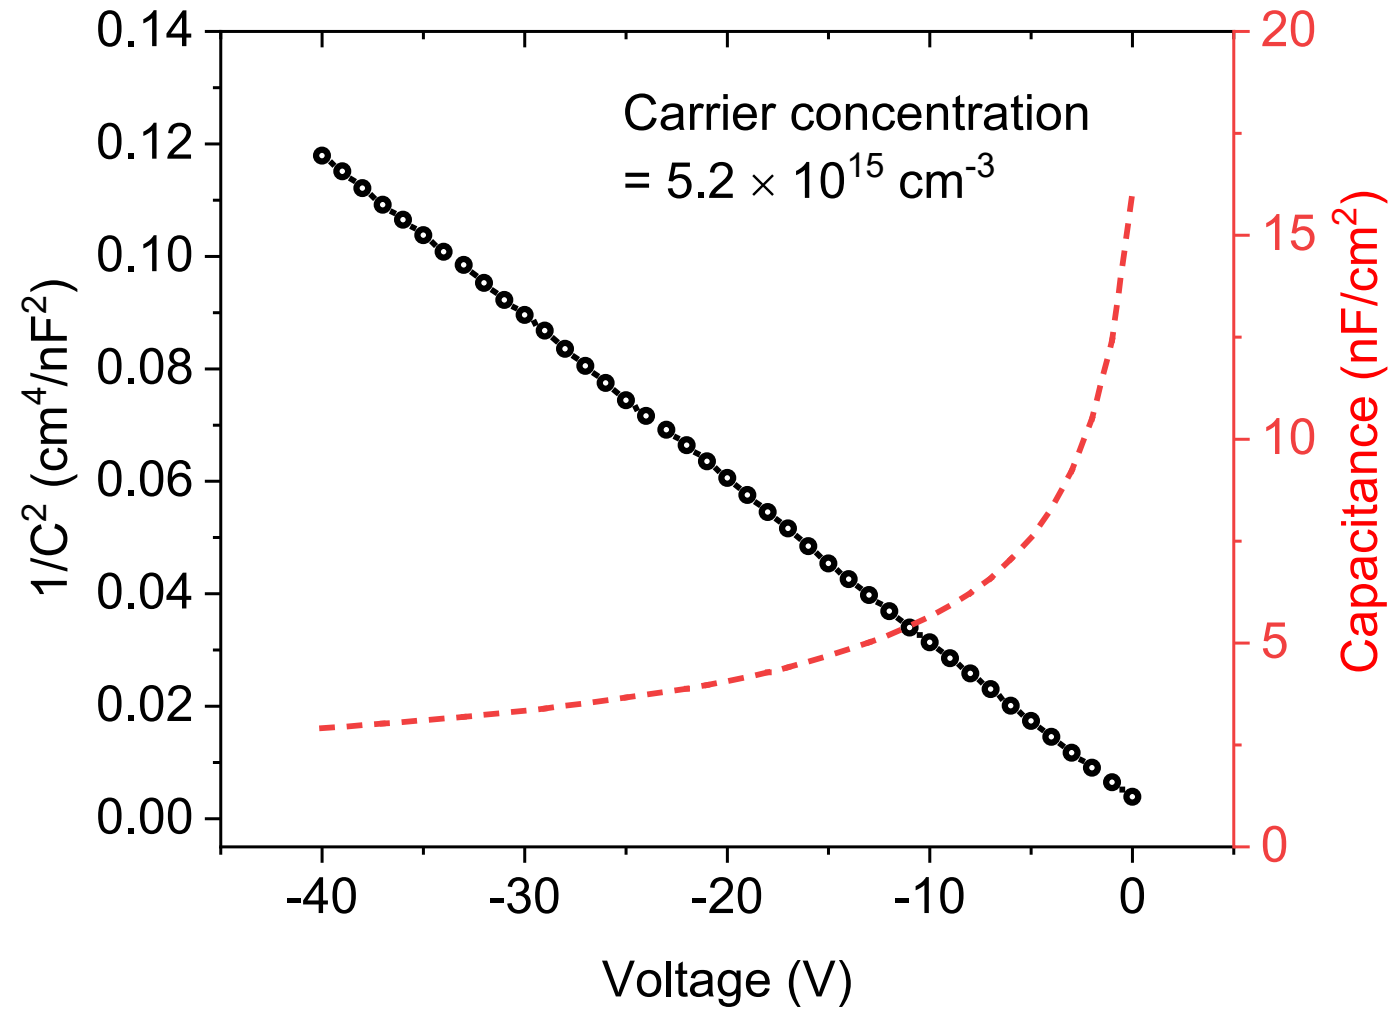

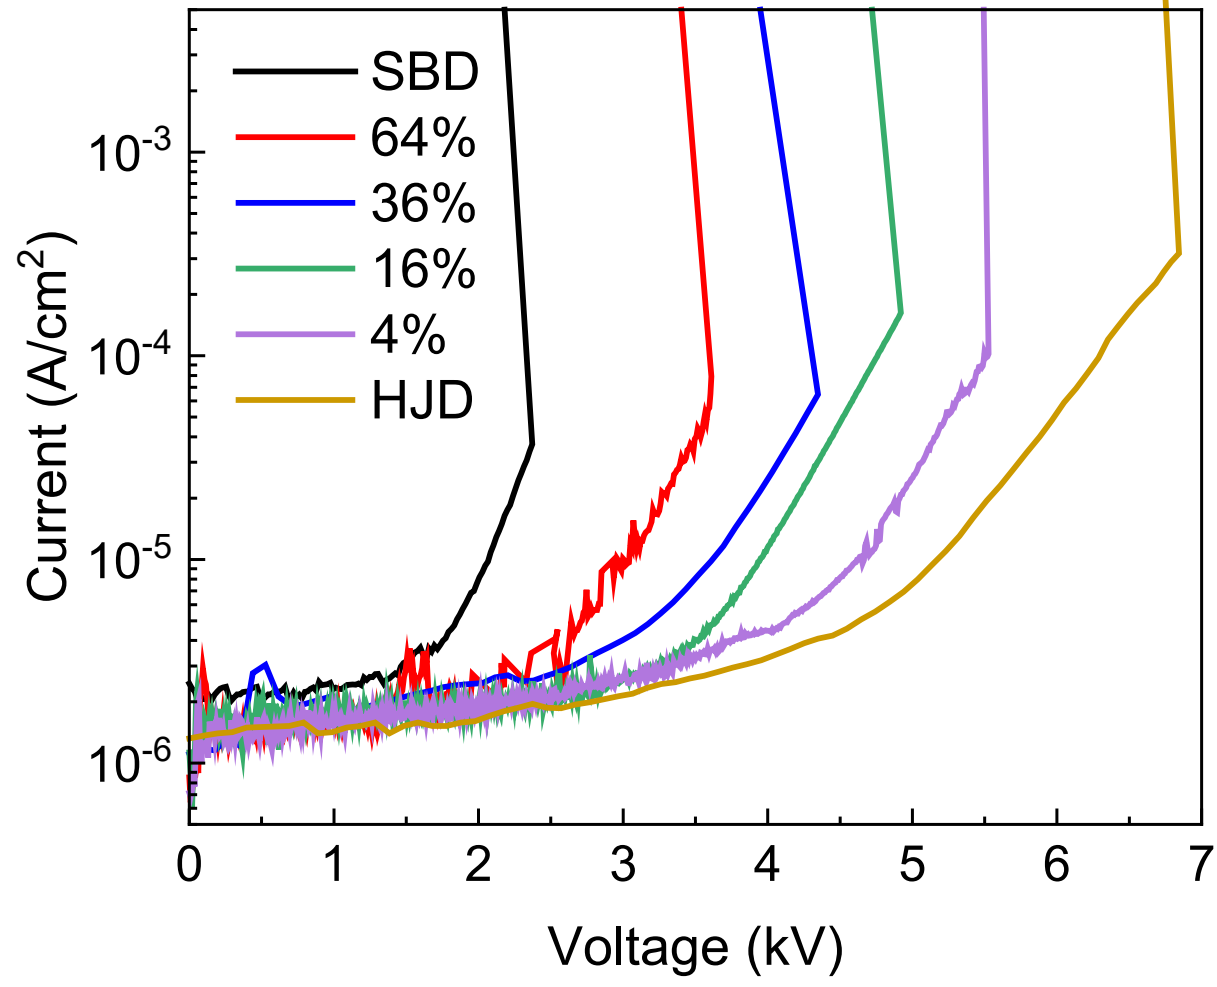

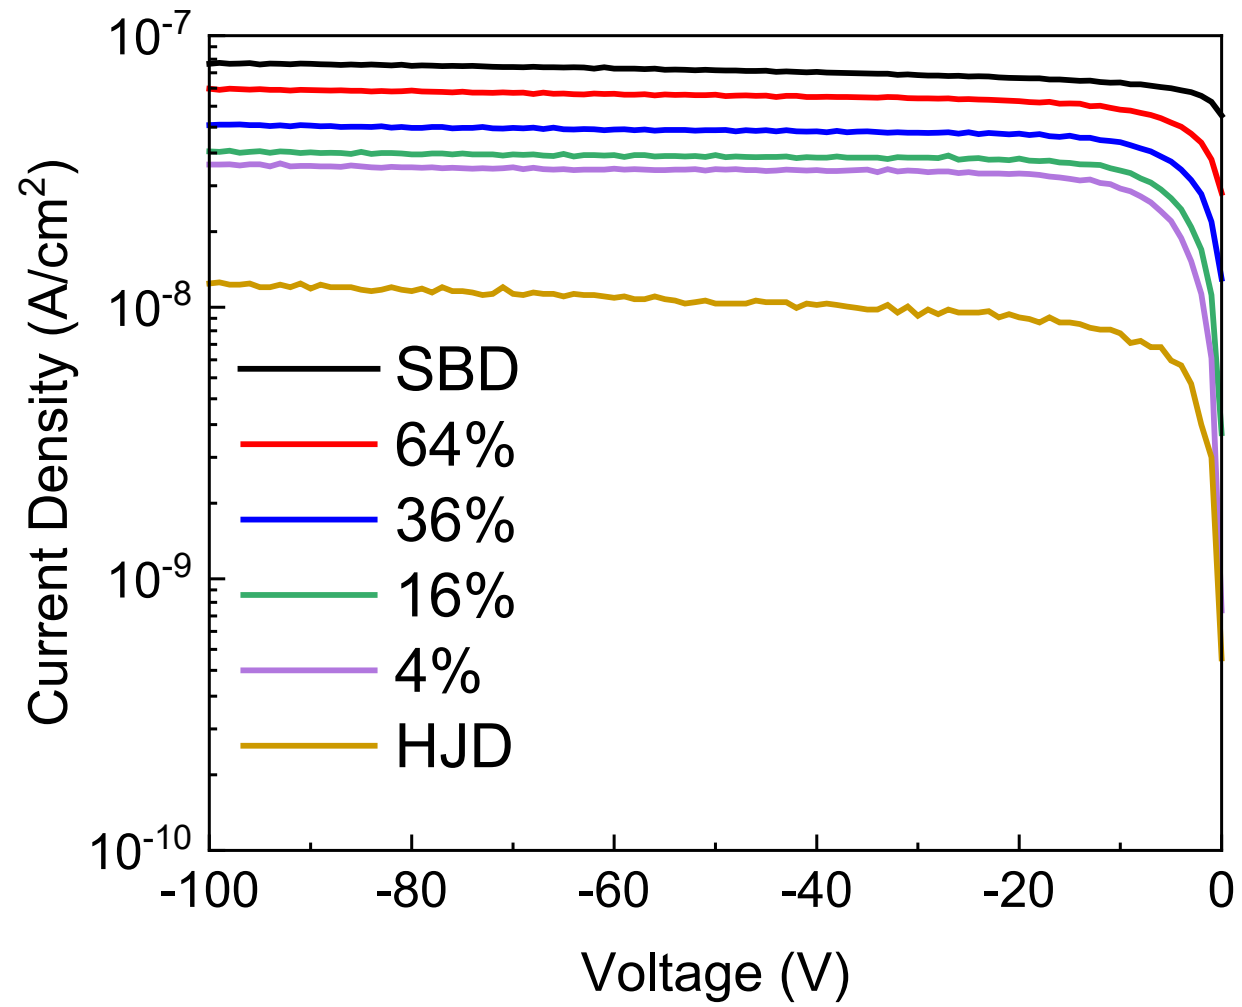

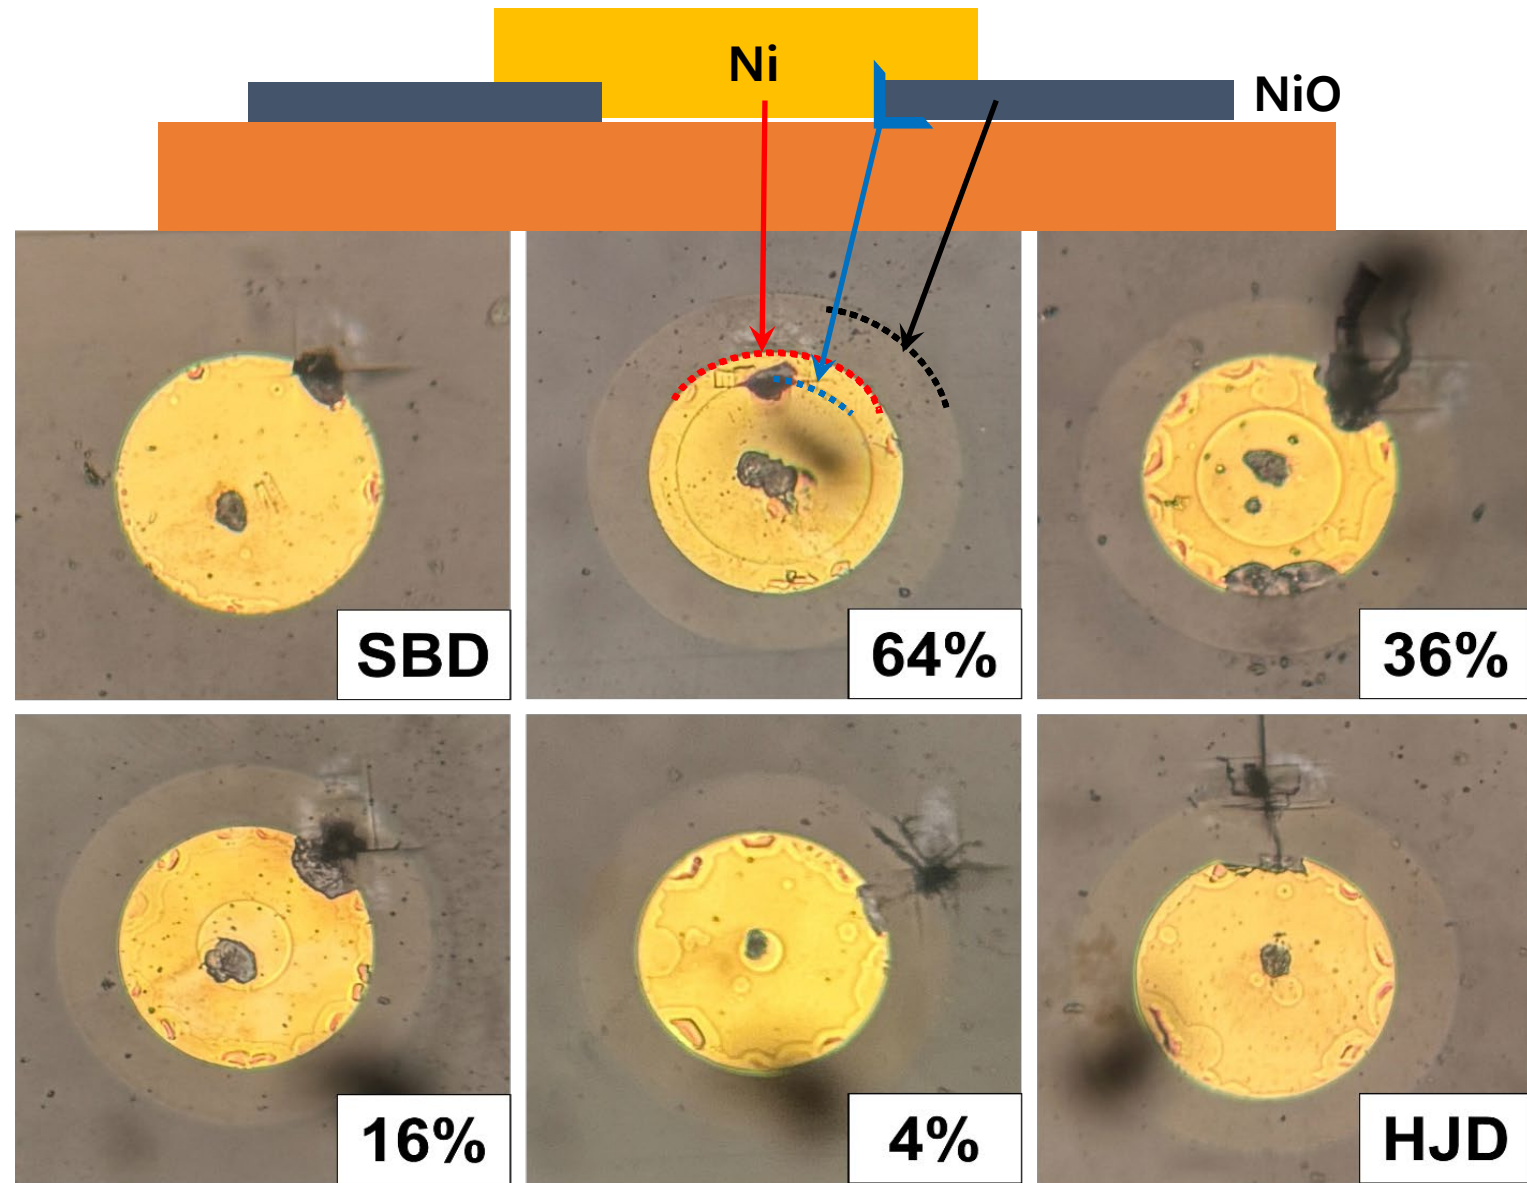

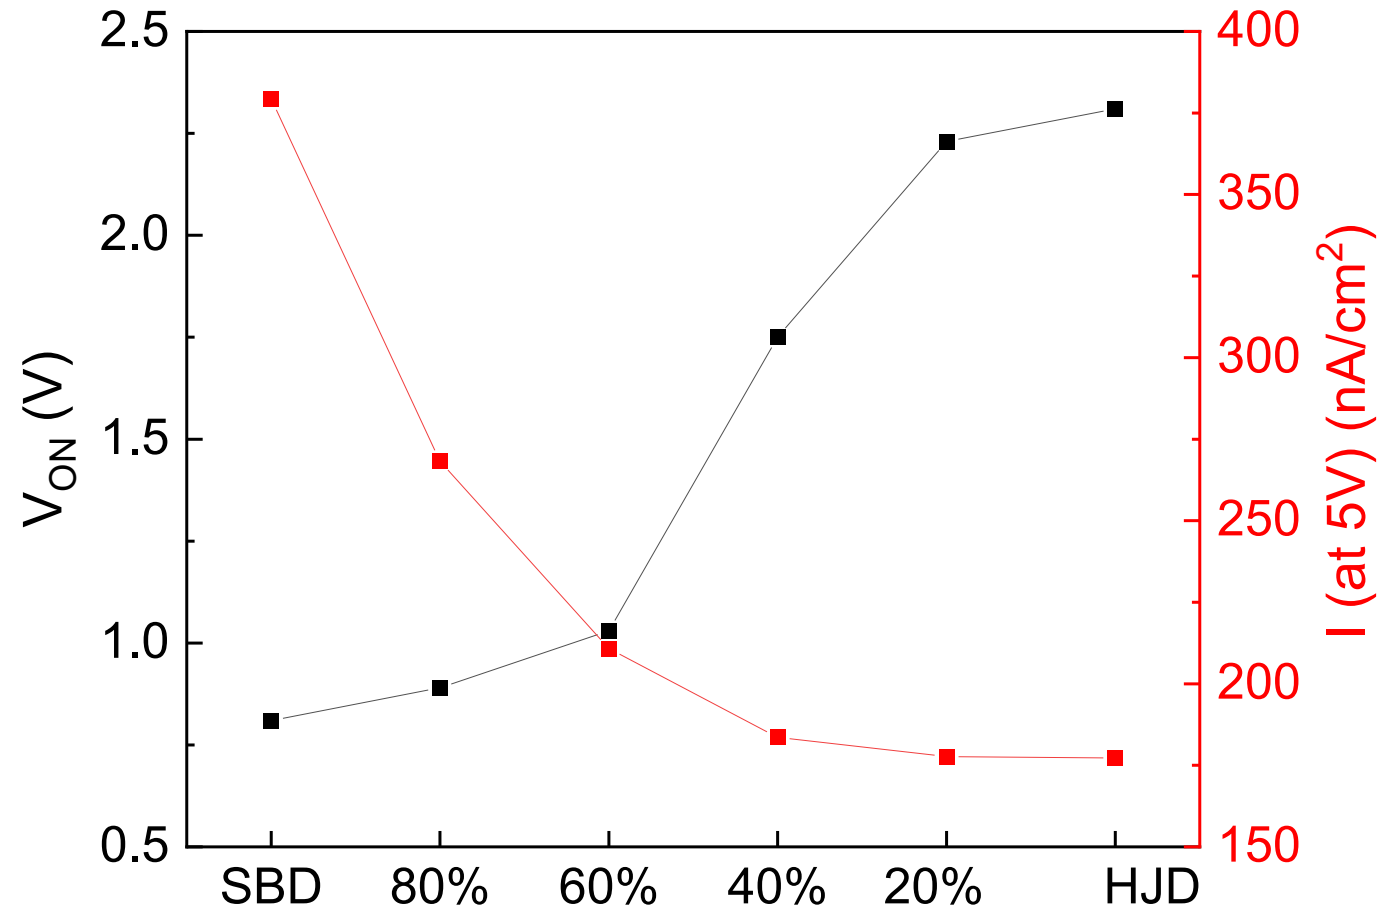

The x-axis shows the percentage of the **area** of the Schottky contact.

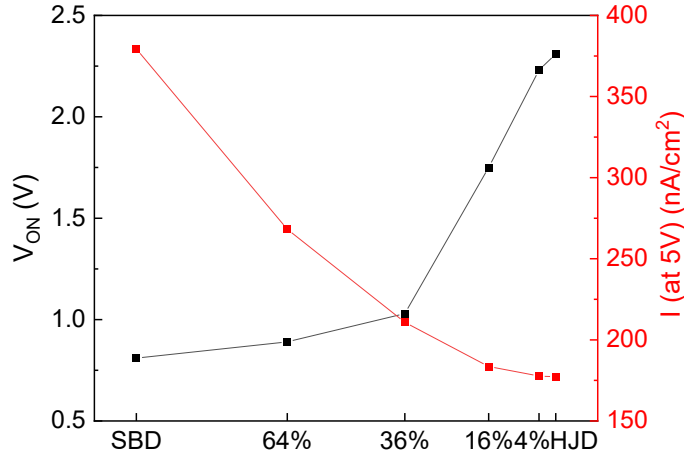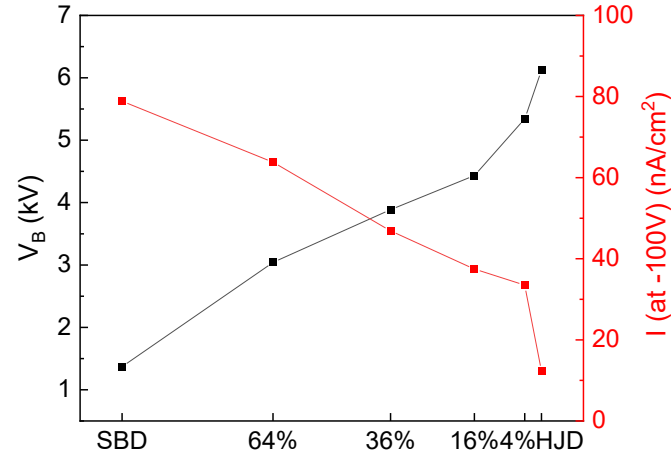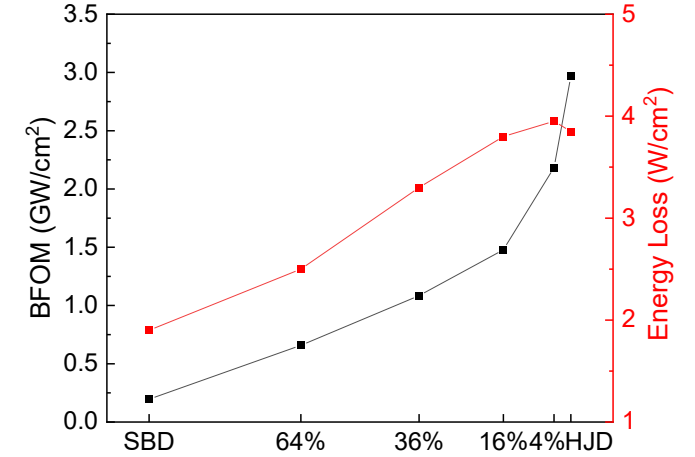

The x-axis shows the percentage of the **diameter** of the Schottky contact.

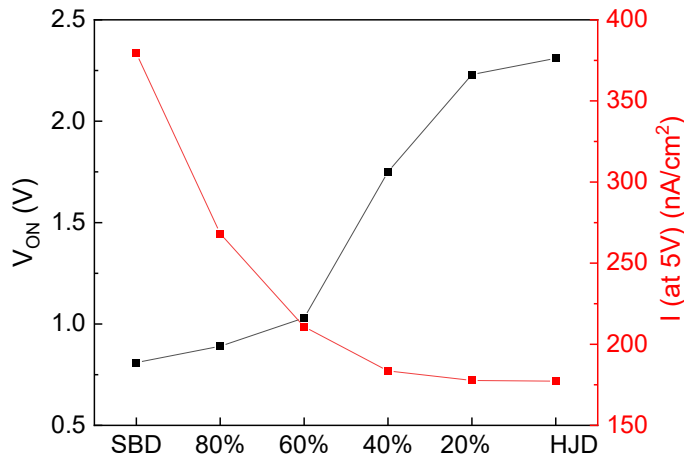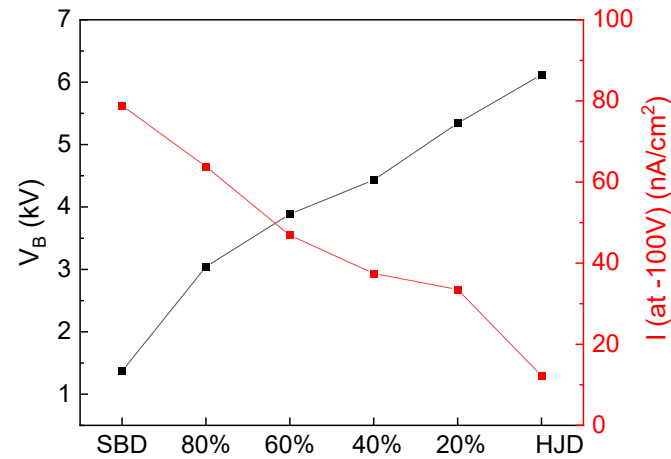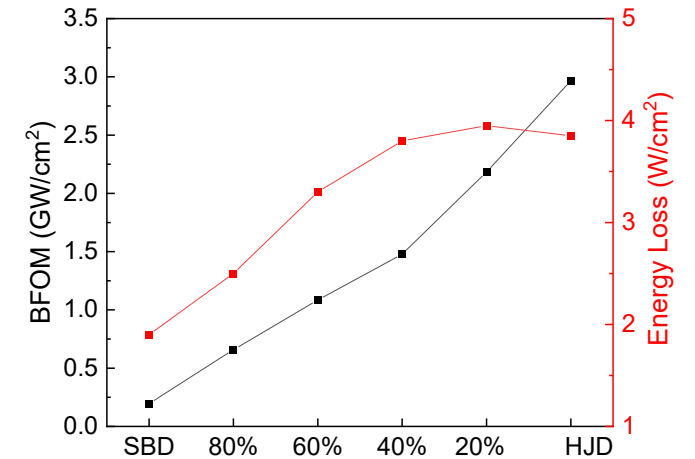

$$\text{Energy loss} = D \cdot P_{ON} + (1-D) \cdot P_{OFF} = D \cdot V_F(\text{at } 100A/cm^2) \cdot 100 A/cm^2 + (1-D) \cdot 100V \cdot I(\text{at-100V}), D = \text{Duty cycle (assume 1\%)}$$

The number of nodes should be increased at the interfaces, as illustrated in the figure.

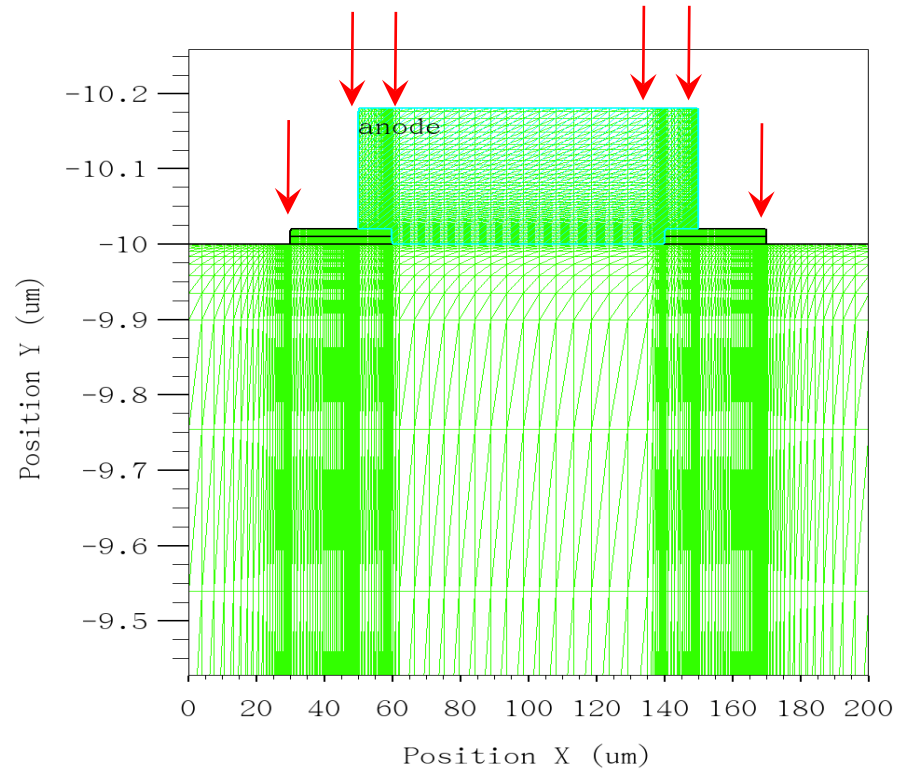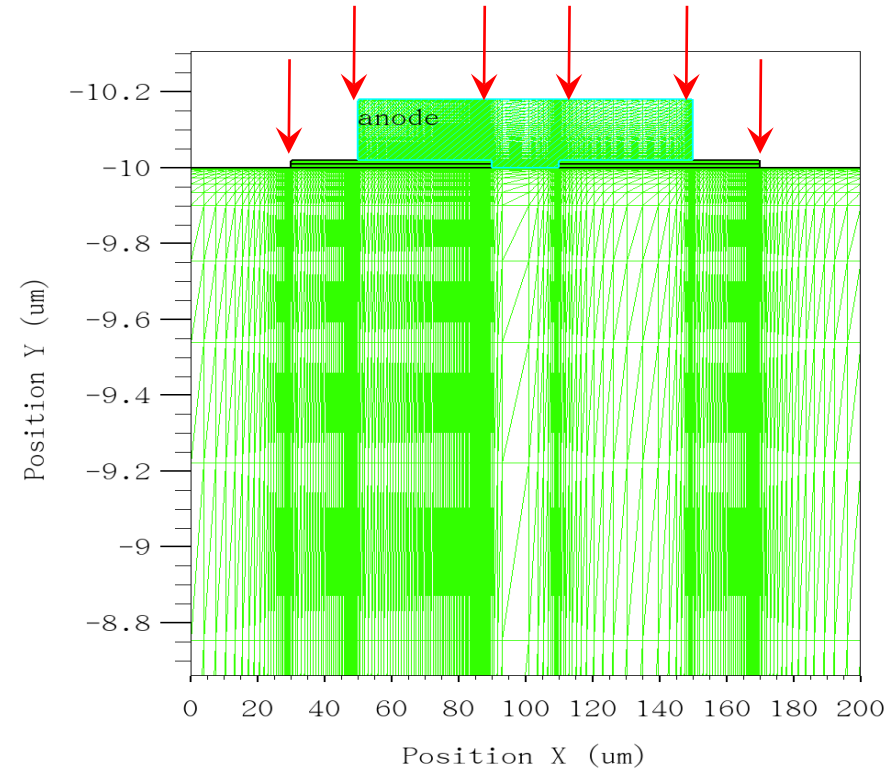

one simulation process  $\longrightarrow$  2-3 hours



Why we have two linear regions for 16 % and 4 %?

## Plan

I will extract the electron current density for the 16% and 4% cases and compare them with the 64% case. I expect there to be two primary electron transfer pathways from  $\text{Ga}_2\text{O}_3$  to Ni in the 16% and 4% scenarios:

**Direct Transfer:** From  $\text{Ga}_2\text{O}_3$  to the Ni contact through the small  $20\ \mu\text{m}$  ring.

**Indirect Transfer:** From  $\text{Ga}_2\text{O}_3$  to the ultrathin NiO layers, then to the Ni contact.

These transfer mechanisms can influence the formation of two linear regions in the current density profiles.

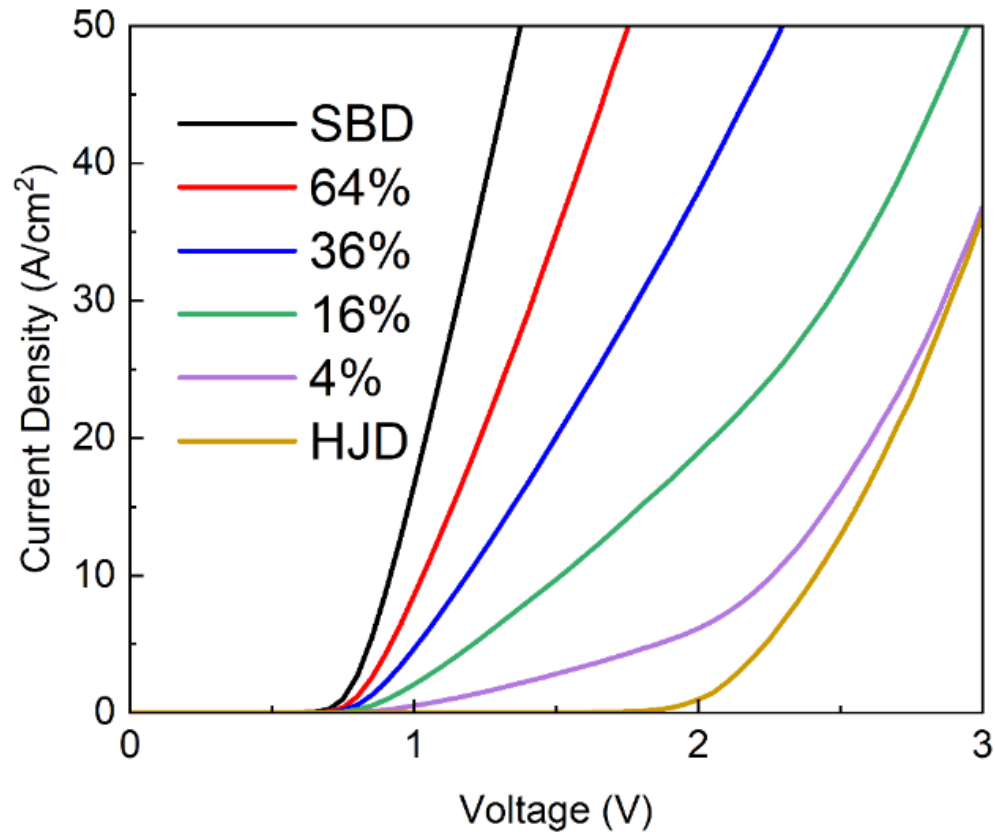

Measured JV

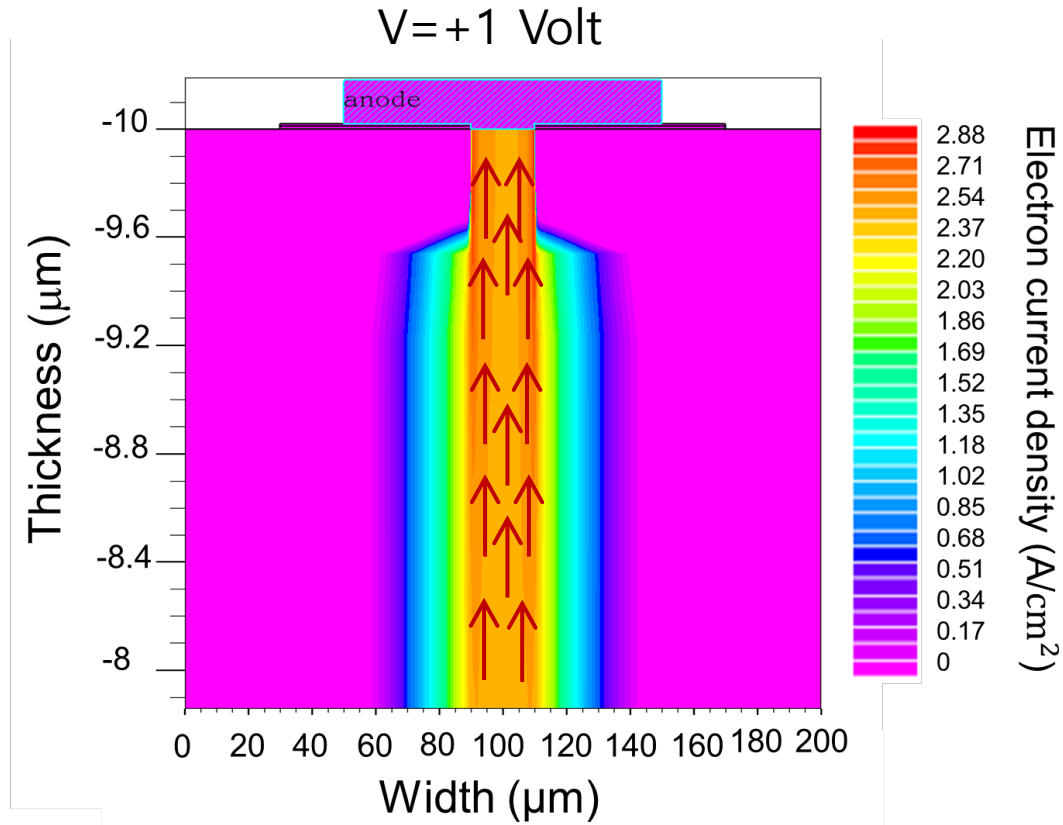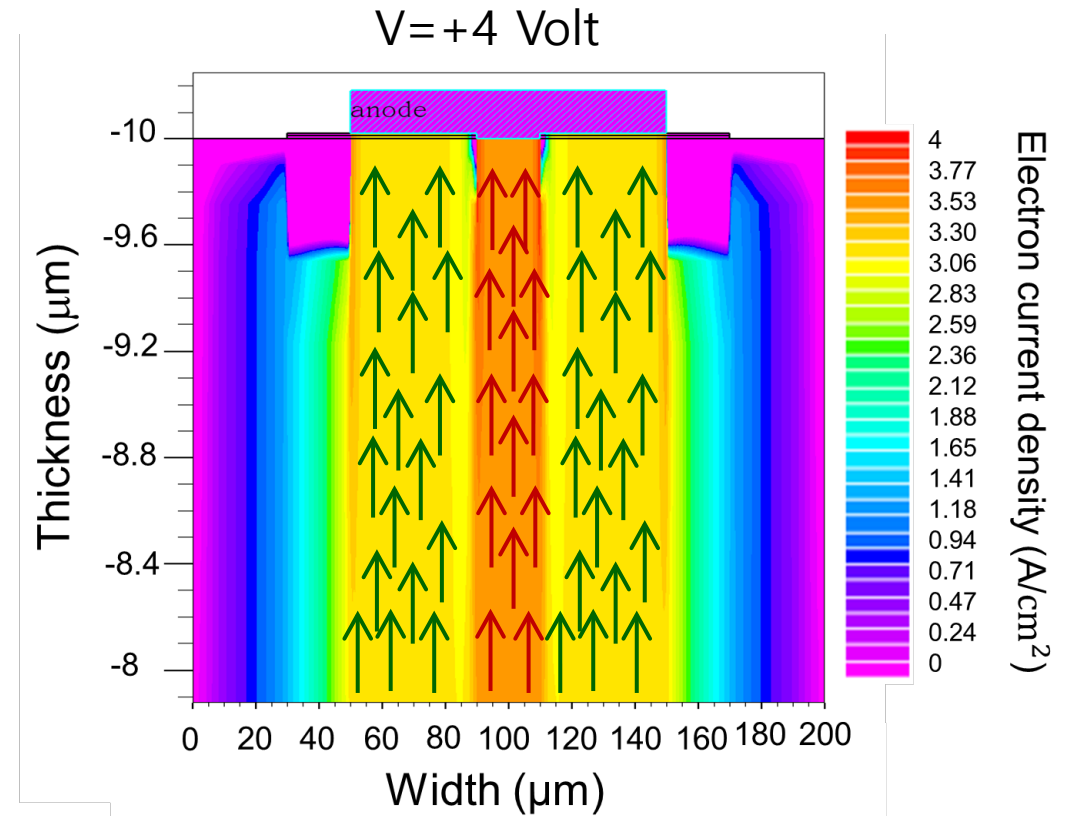

→ Ni/ $\beta\text{-Ga}_2\text{O}_3$  thermionic emission

→ Ni/NiO/ $\beta\text{-Ga}_2\text{O}_3$  thermionic emission

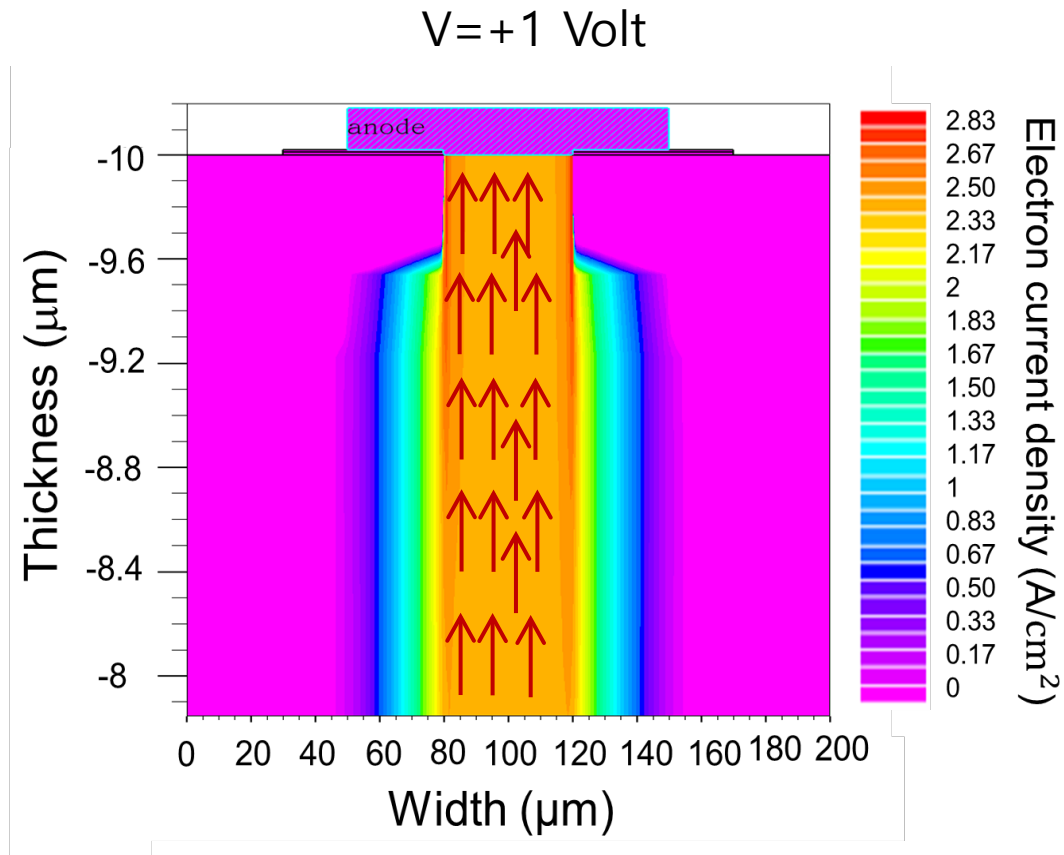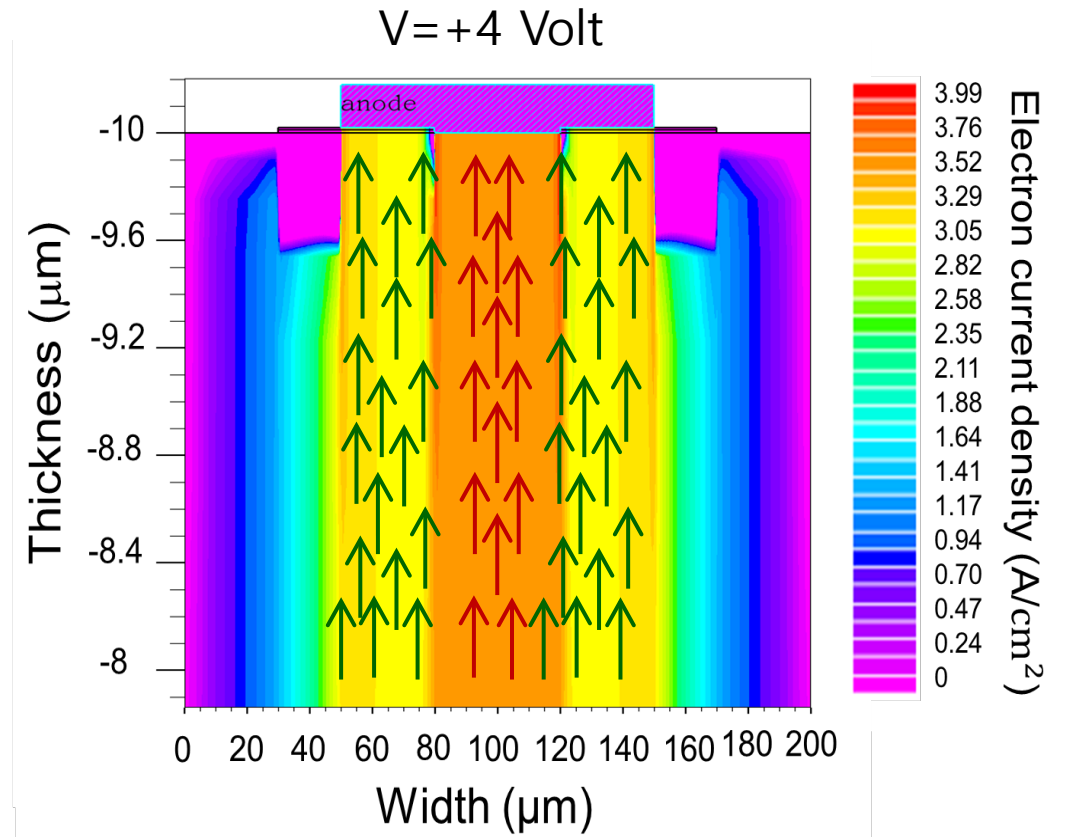

→ Ni/ $\beta\text{-Ga}_2\text{O}_3$  thermionic emission

→ Ni/NiO/ $\beta\text{-Ga}_2\text{O}_3$  thermionic emission

V = +1 Volt

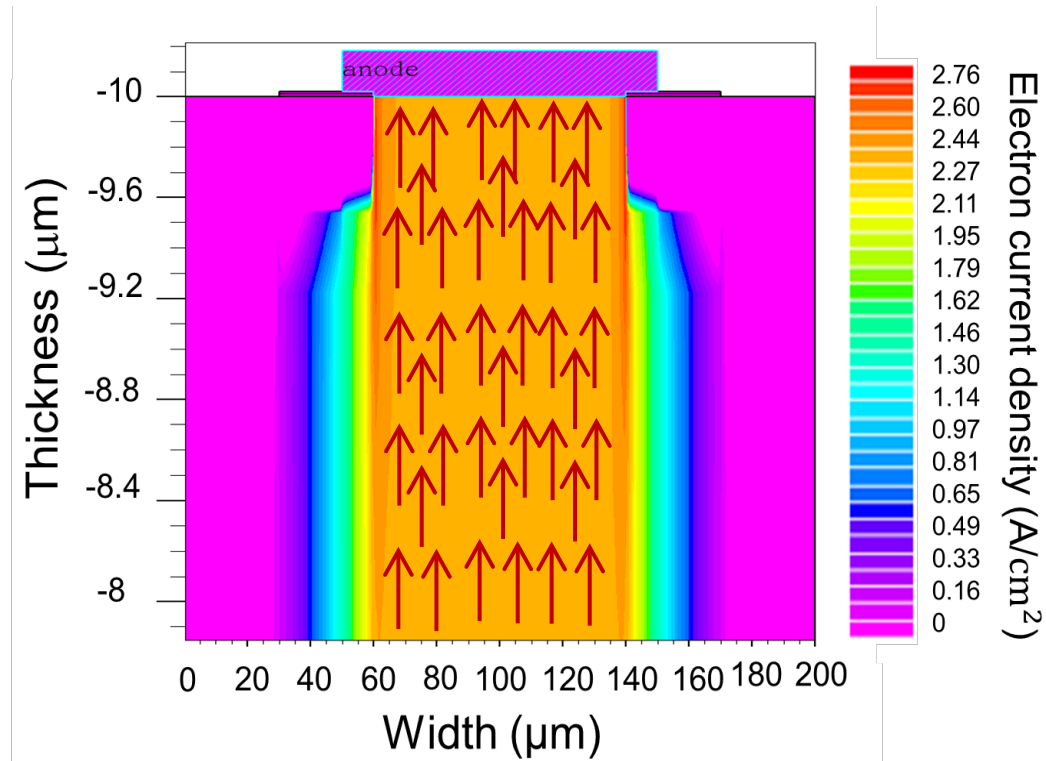

V = +4 Volt

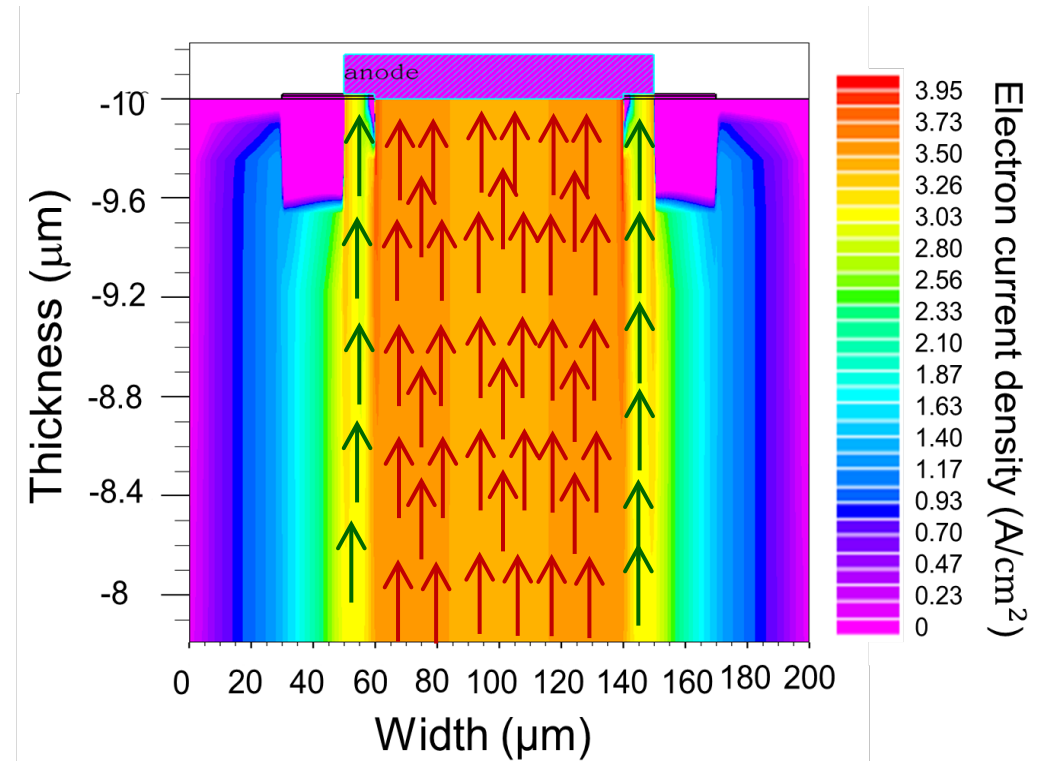

→ Ni/ $\beta$ - $Ga_2O_3$  thermionic emission

→ Ni/NiO/ $\beta$ - $Ga_2O_3$  thermionic emission

## Comparison of Electron Transfer in Junction Barrier Schottky Diodes

### Key Findings:

#### Direct Transfer Efficiency:

The direct transfer for the 64% Junction Barrier Schottky diode is significantly higher compared to the 16% and 4% diodes.

**Impact on Linear Regions:** For the 16% and 4% diodes, the presence of two linear regions can be attributed to the effect of indirect transfer mechanisms.

#### Conclusion:

**Indirect Transfer Mechanism:** In the 16% and 4% Junction Barrier Schottky diodes, the thermionic emission of electrons from  $\text{Ga}_2\text{O}_3$  to the ultrathin NiO layers, followed by transfer to the Ni contact, explains the formation of the two linear regions observed in the current density profiles.

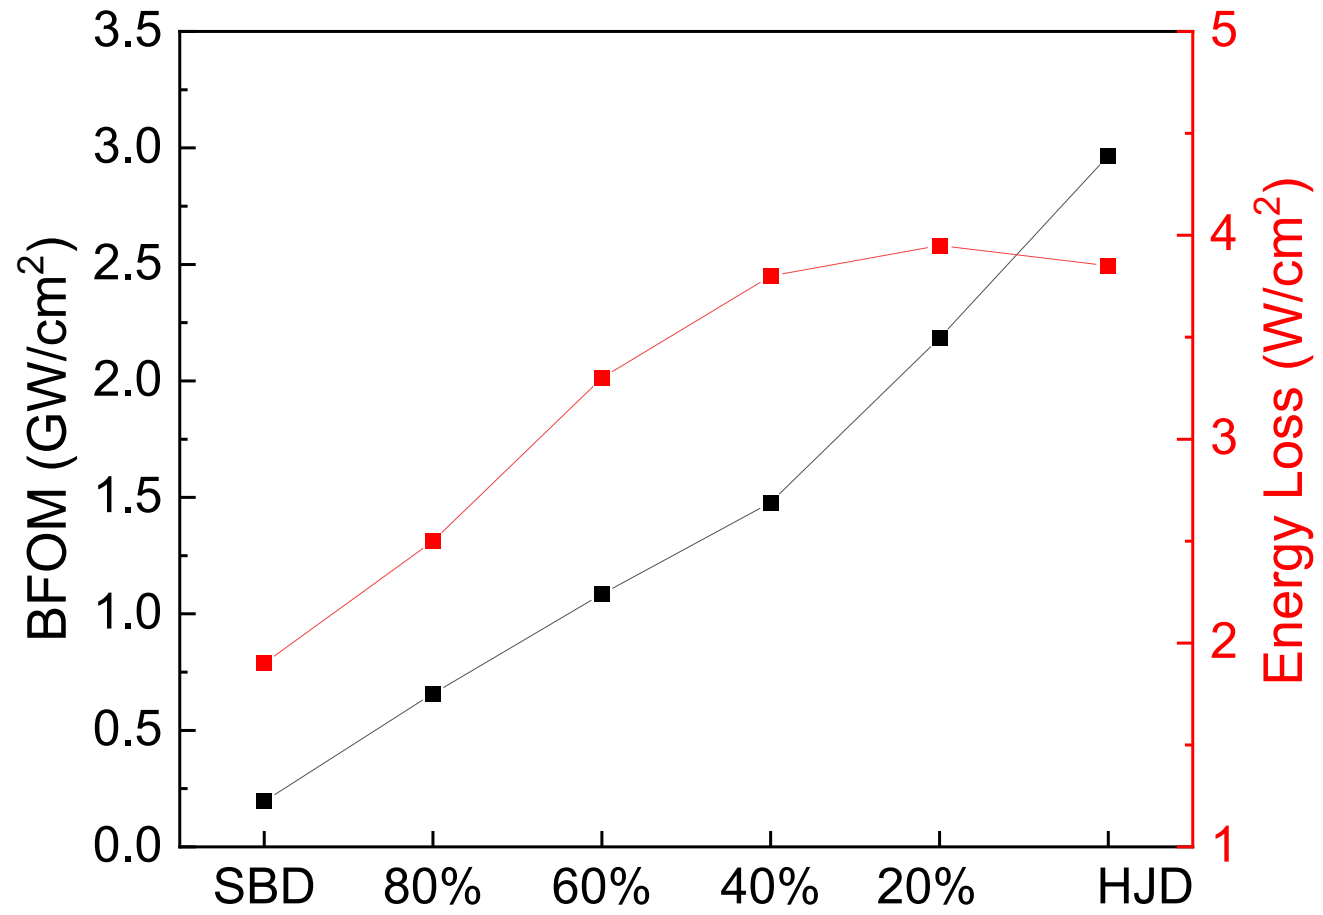

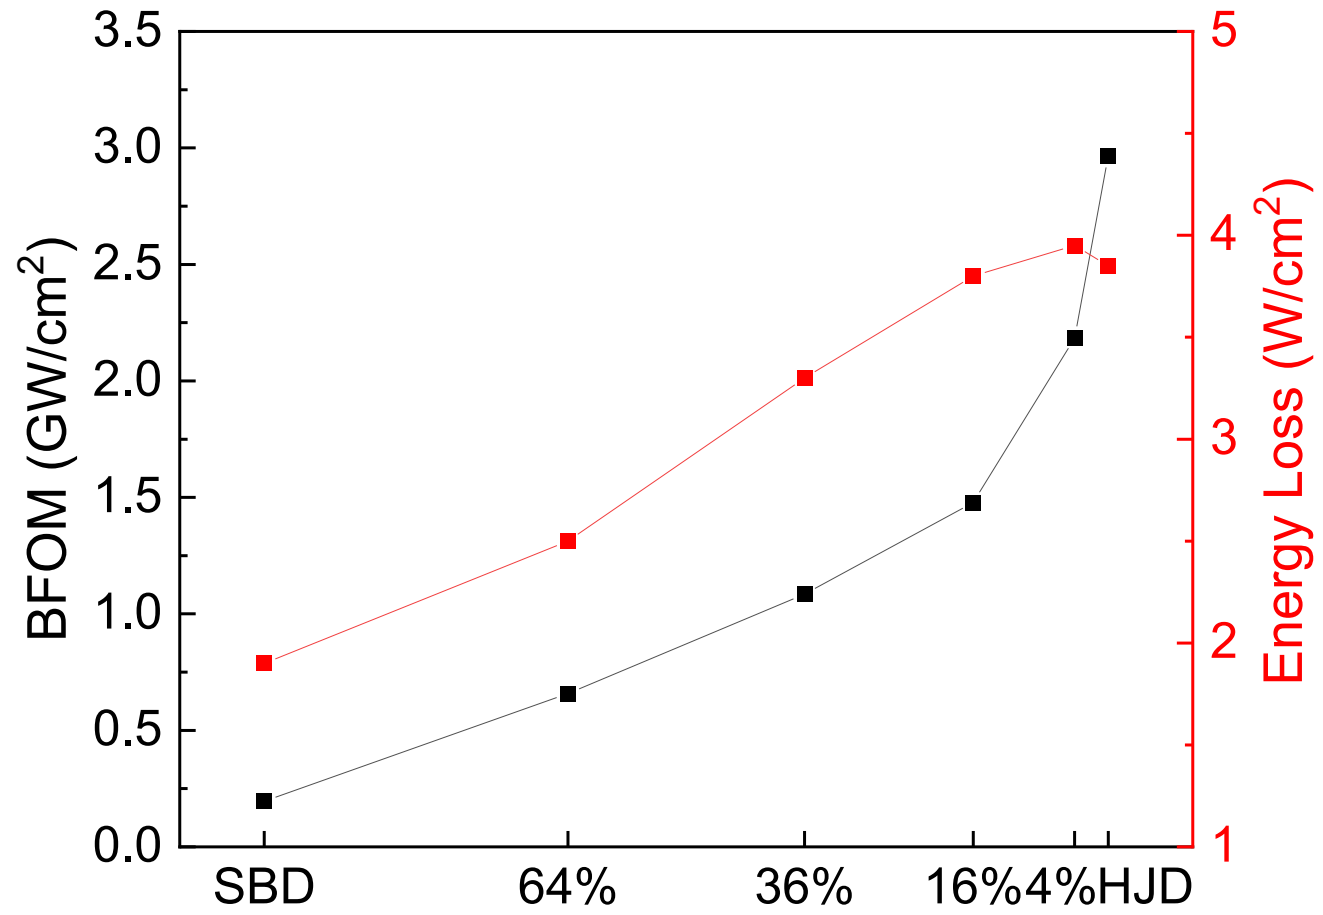

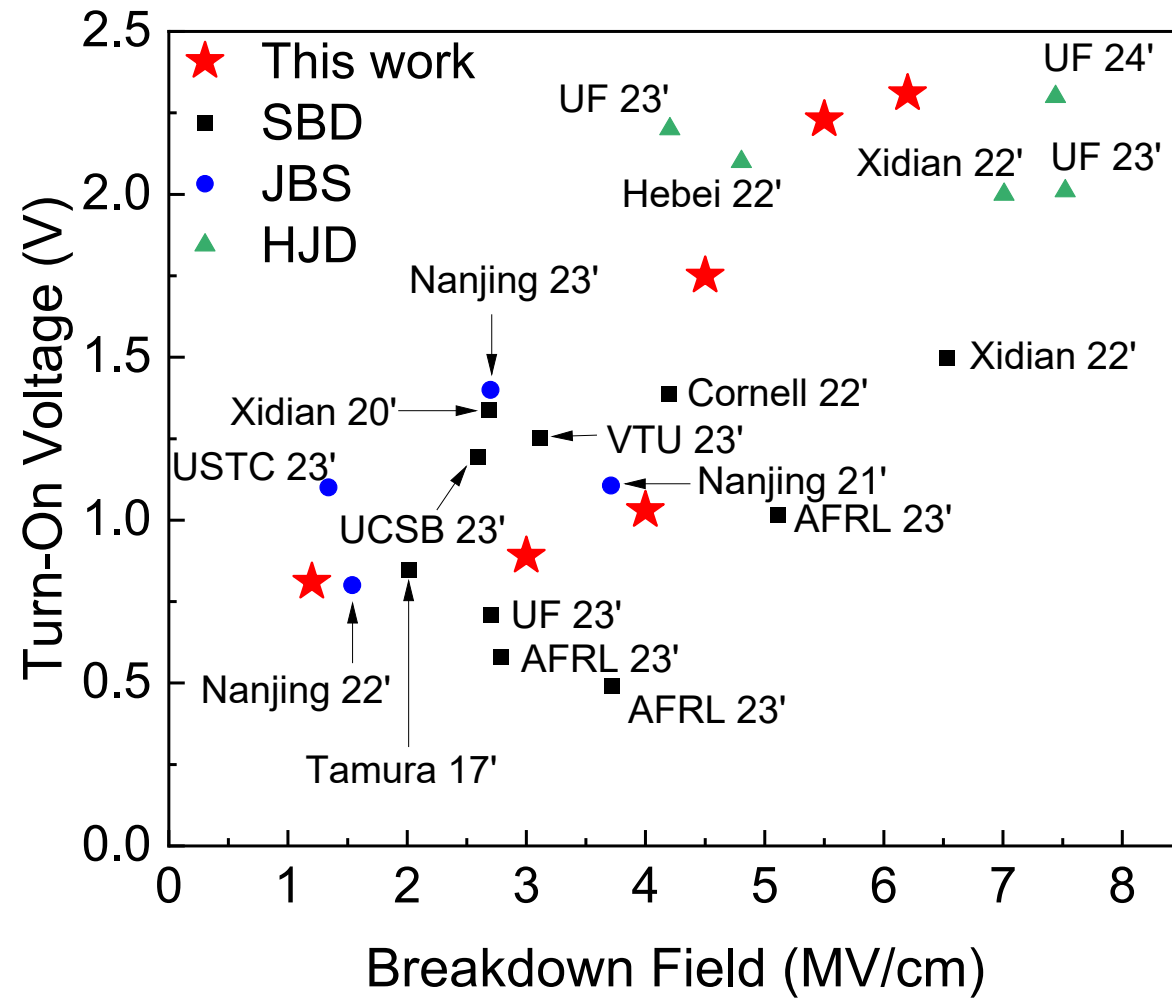

Supplement: d4tc03046j1.pdf [file d4tc03046j1.pdf]
